# Supplementary material
Source: PubMed Central journal article supplement (PMC3242723)

**Table S1. Patient characteristics of the discovery set**

| <b>Total N=20</b>                         |                                         | <b>GI GVHD</b><br>N=10 | <b>No GVHD</b><br>N=10 | <b>p-value</b> |
|-------------------------------------------|-----------------------------------------|------------------------|------------------------|----------------|
| <b>Age (years)</b>                        | <b>Median</b><br>(range)                | <b>52</b><br>(27-60)   | <b>50</b><br>(34-64)   | <b>&gt;0.9</b> |
| <b>Disease (%)</b>                        | <b>Malignant</b>                        | <b>100%</b> (N=10)     | <b>100%</b> (N=10)     | <b>&gt;0.9</b> |
|                                           | <b>Other</b>                            | <b>0%</b> (N=0)        | <b>0%</b> (N=0)        |                |
| <b>Disease status at transplant* (%)</b>  | <b>Other/low/<br/>intermediate risk</b> | <b>60%</b> (N=6)       | <b>50%</b> (N=5)       | <b>&gt;0.9</b> |
|                                           | <b>High risk</b>                        | <b>40%</b> (N=4)       | <b>50%</b> (N=5)       |                |
| <b>Donor type (%)</b>                     | <b>Related donor</b>                    | <b>70%</b> (N=7)       | <b>70%</b> (N=7)       | <b>&gt;0.9</b> |
|                                           | <b>Unrelated donor</b>                  | <b>30%</b> (N=3)       | <b>30%</b> (N=3)       |                |
| <b>Donor match (%)</b>                    | <b>Matched donor</b>                    | <b>100%</b> (N=10)     | <b>90%</b> (N=9)       | <b>&gt;0.9</b> |
|                                           | <b>Mismatched donor</b>                 | <b>0%</b> (N=0)        | <b>10%</b> (N=1)       |                |
| <b>Conditioning regimen intensity (%)</b> | <b>High intensity</b>                   | <b>100%</b> (N=10)     | <b>90%</b> (N=9)       | <b>&gt;0.9</b> |
|                                           | <b>Moderate intensity</b>               | <b>0%</b> (N=0)        | <b>10%</b> (N=1)       |                |
| <b>Grade of GVHD at onset (%)</b>         | <b>0</b>                                | <b>0%</b> (N=0)        | <b>100%</b> (N=10)     |                |
|                                           | <b>I</b>                                | <b>0%</b> (N=0)        | <b>0%</b> (N=0)        |                |
|                                           | <b>II</b>                               | <b>10%</b> (N=1)       | <b>0%</b> (N=0)        |                |
|                                           | <i>Isolated upper GI GVHD</i>           | <b>10%</b> (N=1)       | <b>0%</b> (N=0)        |                |
|                                           | <i>Lower GI GVHD</i>                    | <b>0%</b> (N=0)        | <b>0%</b> (N=0)        |                |
|                                           | <b>III-IV</b>                           | <b>90%</b> (N=9)       | <b>0%</b> (N=0)        |                |
|                                           | <b>GI Stage 2</b>                       | <b>50%</b> (N=5)       | <b>0%</b> (N=0)        |                |
|                                           | <b>GI Stage 3</b>                       | <b>40%</b> (N=4)       | <b>0%</b> (N=0)        |                |
|                                           | <b>GI Stage 4</b>                       | <b>0%</b> (N=0)        | <b>0%</b> (N=0)        |                |
| <b>Day after HCT</b>                      | <b>Median</b><br>(range)                | <b>26</b><br>(7-63)    | <b>27</b><br>(14-70)   | <b>0.7</b>     |

\*High risk of disease status at HCT is according to Center for International Blood and Marrow Transplant Research (CIBMTR) guidelines.

**Table S2. Patient characteristics of the Regensburg/Kyushu validation set**

| Total N=143                        |                                              | GI GVHD <sup>†,‡</sup><br>N=30 | No GVHD<br>N=53    | Non- GVHD<br>Enteritis <sup>§</sup><br>N=11 | Skin GVHD<br>N=49  | p-value     |
|------------------------------------|----------------------------------------------|--------------------------------|--------------------|---------------------------------------------|--------------------|-------------|
| Age (years)                        |                                              |                                |                    |                                             |                    | <b>0.22</b> |
|                                    | Median (range)                               | <b>44</b> (15-63)              | <b>46</b> (24-67)  | 35 (15-51)                                  | <b>44</b> (19-62)  |             |
| Disease (%)                        |                                              |                                |                    |                                             |                    | <b>0.53</b> |
|                                    | Malignant                                    | <b>97%</b> (N=29)              | <b>92%</b> (N=49)  | <b>91%</b> (N=10)                           | <b>98%</b> (N=48)  |             |
|                                    | Other                                        | <b>3%</b> (N=1)                | <b>8%</b> (N=4)    | <b>9%</b> (N=1)                             | <b>2%</b> (N=1)    |             |
| Disease status at transplant* (%)  |                                              |                                |                    |                                             |                    | <b>0.09</b> |
|                                    | Other/low/intermediate risk                  | <b>43%</b> (N=13)              | <b>64%</b> (N=34)  | <b>82%</b> (N=9)                            | <b>53%</b> (N=26)  |             |
|                                    | High risk                                    | <b>57%</b> (N=17)              | <b>36%</b> (N=19)  | <b>18%</b> (N=2)                            | <b>47%</b> (N=23)  |             |
| Donor type (%)                     |                                              |                                |                    |                                             |                    | <b>0.96</b> |
|                                    | Related donor                                | <b>23%</b> (N=7)               | <b>23%</b> (N=12)  | <b>27%</b> (N=3)                            | <b>20%</b> (N=10)  |             |
|                                    | Unrelated donor                              | <b>77%</b> (N=23)              | <b>77%</b> (N=41)  | <b>73%</b> (N=8)                            | <b>80%</b> (N=39)  |             |
| Donor match (%)                    |                                              |                                |                    |                                             |                    | <b>0.25</b> |
|                                    | Matched donor                                | <b>67%</b> (N=20)              | <b>81%</b> (N=43)  | <b>91%</b> (N=10)                           | <b>69%</b> (N=34)  |             |
|                                    | Mismatched donor                             | <b>33%</b> (N=10)              | <b>19%</b> (N=10)  | <b>9%</b> (N=1)                             | <b>31%</b> (N=15)  |             |
| Conditioning regimen intensity (%) |                                              |                                |                    |                                             |                    | <b>0.62</b> |
|                                    | High intensity                               | <b>47%</b> (N=14)              | <b>34%</b> (N=18)  | <b>27%</b> (N=3)                            | <b>37%</b> (N=18)  |             |
|                                    | Moderate intensity                           | <b>53%</b> (N=16)              | <b>66%</b> (N=35)  | <b>73%</b> (N=8)                            | <b>63%</b> (N=31)  |             |
| Grade of GVHD at onset (%)         |                                              |                                |                    |                                             |                    |             |
|                                    | <b>0</b>                                     | <b>0%</b> (N=0)                | <b>100%</b> (N=53) | <b>100%</b> (N=11)                          | <b>0%</b> (N=0)    |             |
|                                    | <b>I</b>                                     | <b>0%</b> (N=0)                | <b>0%</b> (N=0)    | <b>0%</b> (N=0)                             | <b>61%</b> (N=30)  |             |
|                                    | <i>Skin Stage 1</i>                          | <i>0%</i> (N=0)                | <i>0%</i> (N=0)    | <i>0%</i> (N=0)                             | <i>22%</i> (N=11)  |             |
|                                    | <i>Skin Stage 2</i>                          | <i>0%</i> (N=0)                | <i>0%</i> (N=0)    | <i>0%</i> (N=0)                             | <i>39%</i> (N=19)  |             |
|                                    | <b>II</b>                                    | <b>63%</b> (N=19)              | <b>0%</b> (N=0)    | <b>0%</b> (N=0)                             | <b>39%</b> (N=19)  |             |
|                                    | <i>Isolated Skin Stage 3</i>                 | <i>0%</i> (N=0)                | <i>0%</i> (N=0)    | <i>0%</i> (N=0)                             | <i>39%</i> (N=19)  |             |
|                                    | <i>Isolated Upper GI Stage 1<sup>‡</sup></i> | <i>20%</i> (N=6)               | <i>0%</i> (N=0)    | <i>0%</i> (N=0)                             | <i>0%</i> (N=0)    |             |
|                                    | <i>Lower GI Stage 1<sup>‡</sup></i>          | <i>43%</i> (N=13)              | <i>0%</i> (N=0)    | <i>0%</i> (N=0)                             | <i>0%</i> (N=0)    |             |
|                                    | <b>III-IV</b>                                | <b>37%</b> (N=11)              | <b>0%</b> (N=0)    | <b>0%</b> (N=0)                             | <b>0%</b> (N=0)    |             |
|                                    | <i>Isolated Skin Stage 4</i>                 | <i>0%</i> (N=0)                | <i>0%</i> (N=0)    | <i>0%</i> (N=0)                             | <i>0%</i> (N=0)    |             |
|                                    | <i>GI Stage 2<sup>‡</sup></i>                | <i>17%</i> (N=5)               | <i>0%</i> (N=0)    | <i>0%</i> (N=0)                             | <i>0%</i> (N=0)    |             |
|                                    | <i>GI Stage 3<sup>‡</sup></i>                | <i>7%</i> (N=2)                | <i>0%</i> (N=0)    | <i>0%</i> (N=0)                             | <i>0%</i> (N=0)    |             |
|                                    | <i>GI Stage 4<sup>‡</sup></i>                | <i>13%</i> (N=4)               | <i>0%</i> (N=0)    | <i>0%</i> (N=0)                             | <i>0%</i> (N=0)    |             |
| Day after HCT                      |                                              |                                |                    |                                             |                    | <b>0.07</b> |
|                                    | Median (range)                               | <b>19</b> (8-182)              | <b>26</b> (14-86)  | <b>28</b> (14-51)                           | <b>20</b> (11-485) |             |

\*High risk of disease status at HCT is according to Center for International Blood and Marrow Transplant Research (CIBMTR) guidelines.

<sup>†</sup>Including 6 patients with isolated upper GI GVHD and 24 with lower GI ± upper GI GVHD.

<sup>‡</sup>With or without other GVHD target organ involvement.

<sup>§</sup>Including 8 patients with isolated upper GI non-GVHD enteritis and 3 patients with lower GI ± upper GI non-GVHD enteritis.

**Table S3. Causes of non-GVHD enteritis in the Regensburg/Kyushu validation set**

|                                                               |           |
|---------------------------------------------------------------|-----------|
| <b>Non-GVHD lower GI enteritis +/- upper GI symptoms: N=3</b> |           |
| C. difficile infection                                        | 33% (N=1) |
| Diarrhea; biopsy negative                                     | 33% (N=1) |
| Diarrhea; no biopsy, spontaneously resolved                   | 33% (N=1) |
| <b>Non-GVHD upper GI enteritis without diarrhea: N=8</b>      |           |
| Nausea/vomiting; biopsy negative                              | 75% (N=6) |
| Nausea/vomiting; no biopsy, spontaneously resolved            | 12% (N=1) |
| CMV gastritis                                                 | 13% (N=1) |

**Table S4. ELISA assay parameters**

|               | STD Curve Range   | Dilution Factor | CV%* | ULOD        | LLOD        |
|---------------|-------------------|-----------------|------|-------------|-------------|
| <b>REG3a</b>  | 100 – 1.6 ng/ml   | 1/10            | 5.91 | 1.80 ± 0.13 | 0.04 ± 0.08 |
| <b>IL-2Ra</b> | 2000 – 31.2 pg/ml | Undiluted       | 2.59 | 1.11 ± 0.29 | 0.03 ± 0.02 |
| <b>TNFR1</b>  | 800 – 12.5 pg/ml  | 1/25            | 4.23 | 1.64 ± 0.36 | 0.05 ± 0.03 |
| <b>Elafin</b> | 2000 – 31.2 pg/ml | 1/20            | 6.46 | 2.26 ± 0.63 | 0.16 ± 0.05 |
| <b>HGF</b>    | 4000 – 62.5 pg/ml | 1/2             | 2.35 | 1.96 ± 0.60 | 0.07 ± 0.11 |
| <b>IL-8</b>   | 200 – 3.1 pg/ml   | 1/6             | 7.13 | 1.86 ± 0.76 | 0.03 ± 0.04 |

\*CV calculated on 3<sup>rd</sup> highest standard concentration; CV= (standard deviation/mean)\*100.

**Table S5. GI GVHD candidate biomarkers identified by IPAS**

| IPI*               | Gene Name     | Gene description                                                          | RATIO (mean) | #Events  | Preferential GI expression <sup>†</sup> | Suitable antibodies <sup>‡</sup> |
|--------------------|---------------|---------------------------------------------------------------------------|--------------|----------|-----------------------------------------|----------------------------------|
| IPI00032214        | BRD1          | Bromodomain-containing protein 1.                                         | 35.5         | 1        | No                                      | No                               |
| IPI00012549        | PCDHGA11      | Isoform 2 of protocadherin gamma a11 precursor.                           | 34.0         | 1        | No                                      | No                               |
| IPI00738813        | OXR1          | Oxidation Resistance Protein 1                                            | 25.1         | 1        | No                                      | No                               |
| IPI00456604        | FAM19A1       | Family with sequence similarity 19, member A1 precursor                   | 12.0         | 1        | No                                      | No                               |
| IPI00060310        | PLD4          | Phospholipase d4.                                                         | 11.8         | 1        | No                                      | No                               |
| IPI00100668        | GBA2          | Isoform 1 of non-lysosomal glucosylceramidase.                            | 11.7         | 1        | No                                      | No                               |
| <b>IPI00010295</b> | <b>CPN1</b>   | <b>Carboxypeptidase N catalytic chain precursor</b>                       | <b>8.9</b>   | <b>2</b> | <b>Yes</b>                              | <b>No</b>                        |
| IPI00010779        | TPM4          | Isoform 1 of tropomyosin alpha-4 chain.                                   | 8.4          | 1        | No                                      | Yes                              |
| IPI00410143        | CENPM         | Isoform 2 of centromere protein m.                                        | 7.7          | 2        | No                                      | No                               |
| IPI00305698        | GGCX          | Vitamin k-dependent gamma-carboxylase.                                    | 7.6          | 1        | No                                      | No                               |
| IPI00012011        | CFL1          | Cofilin, non-muscle isoform                                               | 7.5          | 9        | No                                      | No                               |
| IPI00059279        | EXOC4         | Exocyst complex component 4                                               | 7.5          | 2        | No                                      | No                               |
| <b>IPI00020687</b> | <b>SPINK1</b> | <b>Pancreatic secretory trypsin inhibitor precursor</b>                   | <b>7.4</b>   | <b>4</b> | <b>Yes</b>                              | <b>No</b>                        |
| IPI00022417        | LRG1          | Leucine-rich alpha-2-glycoprotein precursor.                              | 7.2          | 1        | No                                      | Yes                              |
| IPI00005822        | CDC23         | Cell division cycle protein 23.                                           | 7.0          | 2        | No                                      | No                               |
| IPI00009822        | SRP54         | Signal recognition particle 54 kDa protein                                | 7.0          | 4        | No                                      | No                               |
| IPI00008274        | CAP1          | Adenylyl cyclase-associated protein 1                                     | 6.1          | 2        | No                                      | No                               |
| IPI00009143        | ADAMTS5       | ADAM metalloproteinase with thrombospondin type 1 motif, 5 precursor      | 5.1          | 1        | No                                      | Yes                              |
| IPI00292950        | SERPIND1      | Heparin cofactor II precursor                                             | 4.8          | 7        | No                                      | Yes                              |
| IPI00036578        | ADAMTS12      | ADAM metalloproteinase with thrombospondin type 1 motif, 12 preproprotein | 4.4          | 1        | No                                      | No                               |
| IPI00299155        | PSMA4         | Proteasome subunit alpha type 4.                                          | 4.3          | 2        | No                                      | No                               |
| IPI00216691        | PFN1          | Profilin-1                                                                | 4.2          | 3        | No                                      | No                               |
| IPI00290420        | HPGD          | 15-hydroxy prostaglandin dehydrogenase.                                   | 4.1          | 1        | No                                      | No                               |
| IPI00304922        | LSMD1         | LSM domain containing 1                                                   | 4.0          | 1        | No                                      | No                               |
| IPI00477868        | LAMA5         | Laminin, alpha 5                                                          | 3.8          | 1        | No                                      | No                               |
| IPI00414467        | COLEC12       | Nurse cell scavenger receptor 2                                           | 3.8          | 1        | No                                      | No                               |
| IPI00011155        | ASGR2         | Splice Isoform 1 of Asialoglycoprotein receptor 2                         | 3.7          | 1        | No                                      | No                               |
| IPI00294615        | FBLN5         | Fibulin-5 precursor                                                       | 3.5          | 1        | No                                      | No                               |
| IPI00376787        | EZH2          | Enhancer of zeste 2 isoform a.                                            | 3.3          | 1        | No                                      | No                               |
| IPI00293276        | MIF           | Macrophage migration inhibitory factor                                    | 3.3          | 2        | No                                      | Yes                              |
| IPI00006971        | CD248         | Tumor endothelial marker 1                                                | 3.3          | 2        | No                                      | No                               |
| IPI00184019        | PILRA         | Paired immunoglobulin-like receptor alpha                                 | 3.2          | 1        | No                                      | No                               |
| IPI00019372        | PRG1          | Secretory granule proteoglycan core protein precursor                     | 3.2          | 1        | No                                      | No                               |
| IPI00018136        | VCAM1         | Splice Isoform 1 of Vascular cell adhesion protein 1 precursor            | 3.1          | 11       | No                                      | No                               |
| IPI00022585        | AKAP1         | Isoform 1 of a kinase anchor protein 1, mitochondrial precursor.          | 3.0          | 1        | No                                      | No                               |
| IPI00239077        | HINT1         | Histidine triad nucleotide-binding protein 1                              | 2.9          | 1        | No                                      | No                               |
| <b>IPI00166197</b> | <b>PALLD</b>  | <b>Palladin</b>                                                           | <b>2.9</b>   | <b>1</b> | <b>Yes</b>                              | <b>No</b>                        |
| <b>IPI00009027</b> | <b>REG1A</b>  | <b>Lithostathine 1 alpha precursor</b>                                    | <b>2.9</b>   | <b>3</b> | <b>Yes</b>                              | <b>No</b>                        |
| IPI00298547        | PARK7         | Protein DJ-1                                                              | 2.9          | 2        | No                                      | No                               |
| IPI00218288        | SEC24D        | Sec24-related protein D                                                   | 2.8          | 2        | No                                      | No                               |
| IPI00010341        | PRG2          | Eosinophil granule major basic protein precursor                          | 2.8          | 5        | No                                      | No                               |
| IPI00299977        | PHPT1         | 14 kDa phosphohistidine phosphatase                                       | 2.8          | 1        | No                                      | No                               |
| IPI00004656        | B2M           | Beta-2-microglobulin precursor                                            | 2.8          | 48       | No                                      | Yes                              |
| IPI00030154        | PSME1         | Proteasome activator complex subunit 1.                                   | 2.6          | 3        | No                                      | No                               |
| IPI00328257        | APIB1         | Isoform a of ap-1 complex subunit beta-1.                                 | 2.6          | 1        | No                                      | No                               |
| IPI00291866        | SERPING1      | Plasma protease C1 inhibitor precursor                                    | 2.6          | 60       | No                                      | No                               |
| IPI00001458        | KNTC1         | Kinetochore-associated protein 1.                                         | 2.6          | 1        | No                                      | No                               |
| IPI00002436        | CNOT4         | Isoform 5 of ccr4-not transcription complex subunit 4.                    | 2.6          | 1        | No                                      | No                               |
| IPI00027848        | MRC1          | Macrophage mannose receptor 1 precursor.                                  | 2.6          | 1        | No                                      | No                               |
| IPI00006717        | CCL16         | Small inducible cytokine A16 precursor                                    | 2.6          | 1        | No                                      | Yes                              |
| IPI00022429        | ORM1          | Alpha-1-acid glycoprotein 1 precursor                                     | 2.5          | 192      | No                                      | Yes                              |
| IPI00296713        | GRN           | Splice Isoform 1 of Granulins precursor                                   | 2.5          | 1        | No                                      | Yes                              |
| IPI00022200        | COL6A3        | Alpha 3 type VI collagen isoform 1 precursor                              | 2.4          | 1        | No                                      | No                               |
| IPI00419585        | PPIA          | Peptidyl-prolyl cis-trans isomerase A                                     | 2.4          | 2        | No                                      | No                               |
| IPI00022284        | PRNP          | Major prion protein precursor                                             | 2.4          | 1        | No                                      | Yes                              |
| IPI00032292        | TIMP1         | Metalloproteinase inhibitor 1 precursor                                   | 2.3          | 9        | No                                      | Yes                              |
| IPI00022418        | FN1           | Splice Isoform 1 of Fibronectin precursor                                 | 2.2          | 224      | No                                      | Yes                              |
| IPI00414283        | FN1           | Fibronectin 1 isoform 4 preproprotein.                                    | 2.2          | 36       | No                                      | Yes                              |

| <b>IPI00029039</b> | <b>REG3A</b> | <b>Regenerating islet-derived protein 3 alpha precursor</b>            | <b>2.2</b> | <b>4</b> | <b>Yes</b> | <b>Yes</b> |
|--------------------|--------------|------------------------------------------------------------------------|------------|----------|------------|------------|
| IPI00005769        | FANCG        | Fanconi anemia group g protein.                                        | 2.2        | 1        | No         | No         |
| IPI00164104        | DLEC1        | Isoform 1 of deleted in lung and esophageal cancer protein 1.          | 2.2        | 1        | No         | No         |
| IPI00008148        | GFRA1        | Isoform 1 of gdnf family receptor alpha-1 precursor.                   | 2.1        | 1        | No         | No         |
| IPI00103636        | WFDC2        | Splice Isoform 2 of WAP four-disulfide core domain protein 2 precursor | 2.1        | 2        | No         | No         |
| IPI00376005        | EIF5A        | Isoform 2 of eukaryotic translation initiation factor 5a-1.            | 2.1        | 1        | No         | No         |
| IPI00026941        | PRSS23       | Serine protease 23 precursor                                           | 2.1        | 2        | No         | No         |
| IPI00025155        | FSTL3        | Follistatin-related protein 3 precursor.                               | 2.1        | 1        | No         | Yes        |
| IPI00013831        | CD48         | B-lymphocyte activation marker BLAST-1 precursor                       | 2.1        | 1        | No         | No         |
| IPI00295339        | SELP         | P-selectin precursor                                                   | 2.1        | 1        | No         | Yes        |
| IPI00760855        | TMEM110      | Transmembrane protein 110                                              | 2.0        | 3        | No         | No         |
| IPI00030144        | PPIAL4       | Peptidyl-prolyl cis-trans isomerase.                                   | 2.0        | 1        | No         | No         |
| IPI00479186        | PKM2         | Pyruvate kinase 3 isoform 1 variant                                    | 2.0        | 2        | No         | No         |
| IPI00015029        | PTGES3       | Telomerase-binding protein p23                                         | 2.0        | 3        | No         | No         |
| IPI00029623        | PSMA6        | Proteasome subunit alpha type 6                                        | 2.0        | 2        | No         | No         |
| IPI00219018        | GAPDH        | Glyceraldehyde-3-phosphate dehydrogenase, liver                        | 2.0        | 3        | No         | No         |

\* **IPI**: International Protein Index

† **Preferential GI expression**: proteins expressed in GI tract but not in skin, bone marrow or lymphoid tissue, as referred by gene ontology, human protein atlas and literature search

‡ **Suitable antibodies**: Established antibody pairs for ELISA screening.

| Peptides Level  |     |        |         |         |        |        |       |        |        |      |                        |        |
|-----------------|-----|--------|---------|---------|--------|--------|-------|--------|--------|------|------------------------|--------|
| IPI             | Z   | Time   | PreMass | CalMass | dMppm  | Expect | q3L   | q3H    | NRatio | Prob | Peptide Sequence       | dbHits |
| IPI00029039     | 2   | 1626.3 | 1686.83 | 1686.81 | 11     | 0.098  | 0     | 329190 | 9999   | 0.97 | NPSTISSPGHC[CysH]ASLSR | 1      |
| IPI00029039     | 3   | 1729.8 | 1686.83 | 1686.81 | 10     | 0.054  | 0     | 108078 | 9999   | 1    | NPSTISSPGHC[CysH]ASLSR | 1      |
| IPI00029039     | 2   | 1730.1 | 1686.83 | 1686.81 | 14     | 0.029  | 0     | 67488  | 9999   | 1    | NPSTISSPGHC[CysH]ASLSR | 1      |
| IPI00029039     | 3   | 1641.6 | 1686.83 | 1686.81 | 13     | 0.28   | 0     | 5991   | 9999   | 0.97 | NPSTISSPGHC[CysH]ASLSR | 1      |
| IPI00029039     | 2   | 1609.4 | 1687.84 | 1686.81 | 15     | 0.085  | 0     | 25367  | 9999   | 0.86 | NPSTISSPGHC[CysH]ASLSR | 1      |
| IPI00029039     | 3   | 1885.1 | 1687.83 | 1686.81 | 8      | 0.64   | 3852  | 6344   | 1.6    | 0.91 | NPSTISSPGHC[CysH]ASLSR | 1      |
| IPI00029039     | 3   | 1500.9 | 1686.83 | 1686.81 | 14     | 0.1    | 11429 | 23797  | 2.0    | 0.99 | NPSTISSPGHC[CysH]ASLSR | 1      |
| IPI00029039     | 3   | 1597.4 | 1686.83 | 1686.81 | 14     | 0.39   | 0     | 5007   | 9999   | 0.99 | NPSTISSPGHC[CysH]ASLSR | 1      |
| IPI00029039     | 3   | 1836.6 | 1687.83 | 1686.81 | 11     | 2.2    | 740   | 1279   | 1.7    | 0.81 | NPSTISSPGHC[CysH]ASLSR | 1      |
| IPI00029039     | 2   | 2462   | 1310.6  | 1310.59 | 8      | 0.017  | 0     | 341159 | 9999   | 1    | SWTDADLAC[CysH]QK      | 1      |
| IPI00029039     | 2   | 2565.4 | 1310.61 | 1310.59 | 12     | 0.012  | 24969 | 103841 | 4.0    | 1    | SWTDADLAC[CysH]QK      | 1      |
| Big Quant Level |     |        |         |         |        |        |       |        |        |      |                        |        |
| IPI             | Chr | Length | MW      | GMean   | Events | StDev  | TTest | Pvalue |        |      |                        |        |
| IPI00029039     | 2   | 175    | 19395   | 2.2     | 4      | 0.43   | 3.6   | 0.0343 |        |      |                        |        |

IPI: International Protein Index; Z: charge, PreMass: Precursor Mass; CalMass: Calculated Mass; dMppm: fractional delta mass in part per million; Expect: Expected value; q3L: quantified Light value; q3H: quantified Heavy value; Nratio: Normalized ratio; Prob: Peptide Probability; dbHits: number of indistinguishable hits in IPI database; GMean: geometric mean.

|                         |     |
|-------------------------|-----|
| Isolated skin GVHD      | 339 |
| Isolated GI GVHD*       | 118 |
| GI GVHD plus skin GVHD† | 79  |

\* Including 9 patients with liver GVHD  
† Including 13 patients with liver GVHD

| <b>Table S8. Positive (PPV) and negative (NPV) predictive values for GI GVHD of plasma REG3<math>\alpha</math> concentrations at the onset of diarrhea</b> |            |            |
|------------------------------------------------------------------------------------------------------------------------------------------------------------|------------|------------|
| <b>Cutoff</b>                                                                                                                                              | <b>PPV</b> | <b>NPV</b> |
| 151 ng/ml (50 %-ile*)                                                                                                                                      | 95%        | 32%        |
| 100 ng/ml (42%-ile*)                                                                                                                                       | 95%        | 35%        |
| 57 ng/ml (25 %-ile*)                                                                                                                                       | 92%        | 44%        |
| 28 ng/ml (10 %-ile*)                                                                                                                                       | 84%        | 50%        |

\* %-ile of REG3 $\alpha$  concentration in patients with lower GI GVHD at onset.

| <b>Table S9. Causes of 1-year mortality in lower GI GVHD patients (N=97)</b> |                   |
|------------------------------------------------------------------------------|-------------------|
| <b>Non-relapse mortality</b>                                                 | <b>79% (N=77)</b> |
| Acute GVHD                                                                   | 65% (N=50)        |
| Infection/sepsis                                                             | 12% (N=9)         |
| Chronic GVHD                                                                 | 12% (N=9)         |
| Graft failure                                                                | 3% (N=2)          |
| Multiple organ failure                                                       | 1% (N=1)          |
| SOS                                                                          | 1% (N=1)          |
| Intracranial hemorrhage                                                      | 1% (N=1)          |
| Unknown                                                                      | 5% (N=4)          |
| <b>Relapse mortality</b>                                                     | <b>21% (N=20)</b> |

| <b>Table S10. GI GVHD patients by number of risk factors (N=140)</b> |                 |
|----------------------------------------------------------------------|-----------------|
| <b>0 risk factors</b>                                                | <b>31 (22%)</b> |
| <b>1 risk factor</b>                                                 | <b>49 (35%)</b> |
| High REG3 $\alpha$                                                   | 27 (19%)        |
| GI GVHD onset stage 2-4                                              | 21 (15%)        |
| Histologic grade 4                                                   | 1 (1%)          |
| <b>2 risk factors</b>                                                | <b>46 (33%)</b> |
| High REG3 $\alpha$ /GI GVHD onset stage 2-4                          | 28 (20%)        |
| High REG3 $\alpha$ /Histologic grade 4                               | 8 (6%)          |
| GI GVHD onset stage 2-4/Histologic grade 4                           | 10 (7%)         |
| <b>3 risk factors</b>                                                | <b>14 (10%)</b> |

**Figure S1. Identification of REG3 $\alpha$  through discovery phase proteomics.** MS/MS of the identified peptide, REG3 $\alpha$ . B<sub>n</sub> or y<sub>n</sub> denotes the fragment ion generated by cleavage of the peptide bond after the n<sup>th</sup> amino acid containing either the peptide N terminus (b series) or the C terminus (y series), respectively. The identified b and y ions and all fragment ion (m/z) values are indicated in the table. C\* denotes cysteine residues modified by acrylamide containing three <sup>13</sup>C atoms. The identified peptide sequence location is highlighted in red within the protein sequence.

**Figure S2. REG3 $\alpha$  concentrations in the discovery set.** Plasma concentrations of REG3 $\alpha$  were measured by ELISA in the 20 individual samples of the discovery set, and are presented as scatter plots with lines for means.

**Figure S3. ROC curves for two independent validation sets.** ROC curves comparing plasma REG3 $\alpha$  concentrations in patients with diarrhea caused by GVHD (N=162) and not caused by GVHD (N=42). University of Michigan validation set (thick line), AUC=0.80; Regensburg/Kyushu validation set (dashed line), AUC=0.84.

**Figure S4. ROC curve for patients with less than 1 liter of stool per day.** ROC curve comparing plasma REG3 $\alpha$  concentrations in patients with diarrhea less than 1000 ml/day caused by GVHD (N=80) and not caused by GVHD (N=29); AUC=0.81.

**Figure S5. Albumin concentrations by severity of lower GI GVHD diarrhea.** (A) Serum albumin correlation by clinical lower GI GVHD stage. Stage 1 (N=67) versus stage 2-4 (N=73), p=0.005. (B) Serum albumin concentrations and histologic grade. Histologic grade 1-3 (intact mucosa, N=107) versus grade 4 (denuded mucosa; N=33), p=0.04.

**Figure S6. Correlation of REG3 $\alpha$  concentrations at onset of lower GI GVHD correlate with eventual maximum GVHD severity.** Plasma REG3 $\alpha$  concentrations in patients with lower GI GVHD at onset (y-axis) are compared between patients with maximum GVHD severity of grade 2 (N=49) and patients who eventually developed maximum grade 3-4 GVHD (N=113), p<0.001.

**Figure S7. 1-Year NRM for lower GI GVHD patients by other risk factors and risk factor combinations.** (A) 1-year NRM by Clinical GI GVHD stage 2-4 (solid line) versus stage 1 (dashed line); 61% vs. 33%, respectively; p<0.001. (B) 1-year NRM by histologic grade 4 GI GVHD (solid line) versus histologic grade 1-3 (dashed line); 73% vs. 40%, p<0.001. (C) 1 year NRM for patients classified by number of risk factors at GVHD onset, using onset REG3 $\alpha$  concentration (high risk > 151 ng/ml) and clinical stage (high risk = stage 2-4). 0 (purple, NRM=27%); 1 (red, NRM=40%); 2 (blue, NRM=75%). 0 vs. 1, p=0.1; 1 vs. 2, p<0.001. (D) 1 year NRM for patients classified by number of risk factors at GVHD onset, using onset REG3 $\alpha$  concentration (high risk > 151 ng/ml) and histologic grade (high risk = grade 4). 0 (purple, NRM=31%); 1 (red, NRM=49%); 2 (blue, NRM=82%). 0 vs. 1, p=0.02; 1 vs. 2, p<0.001.

# Figure S1

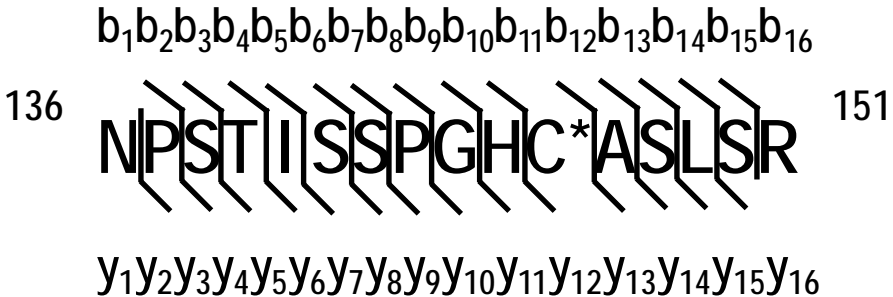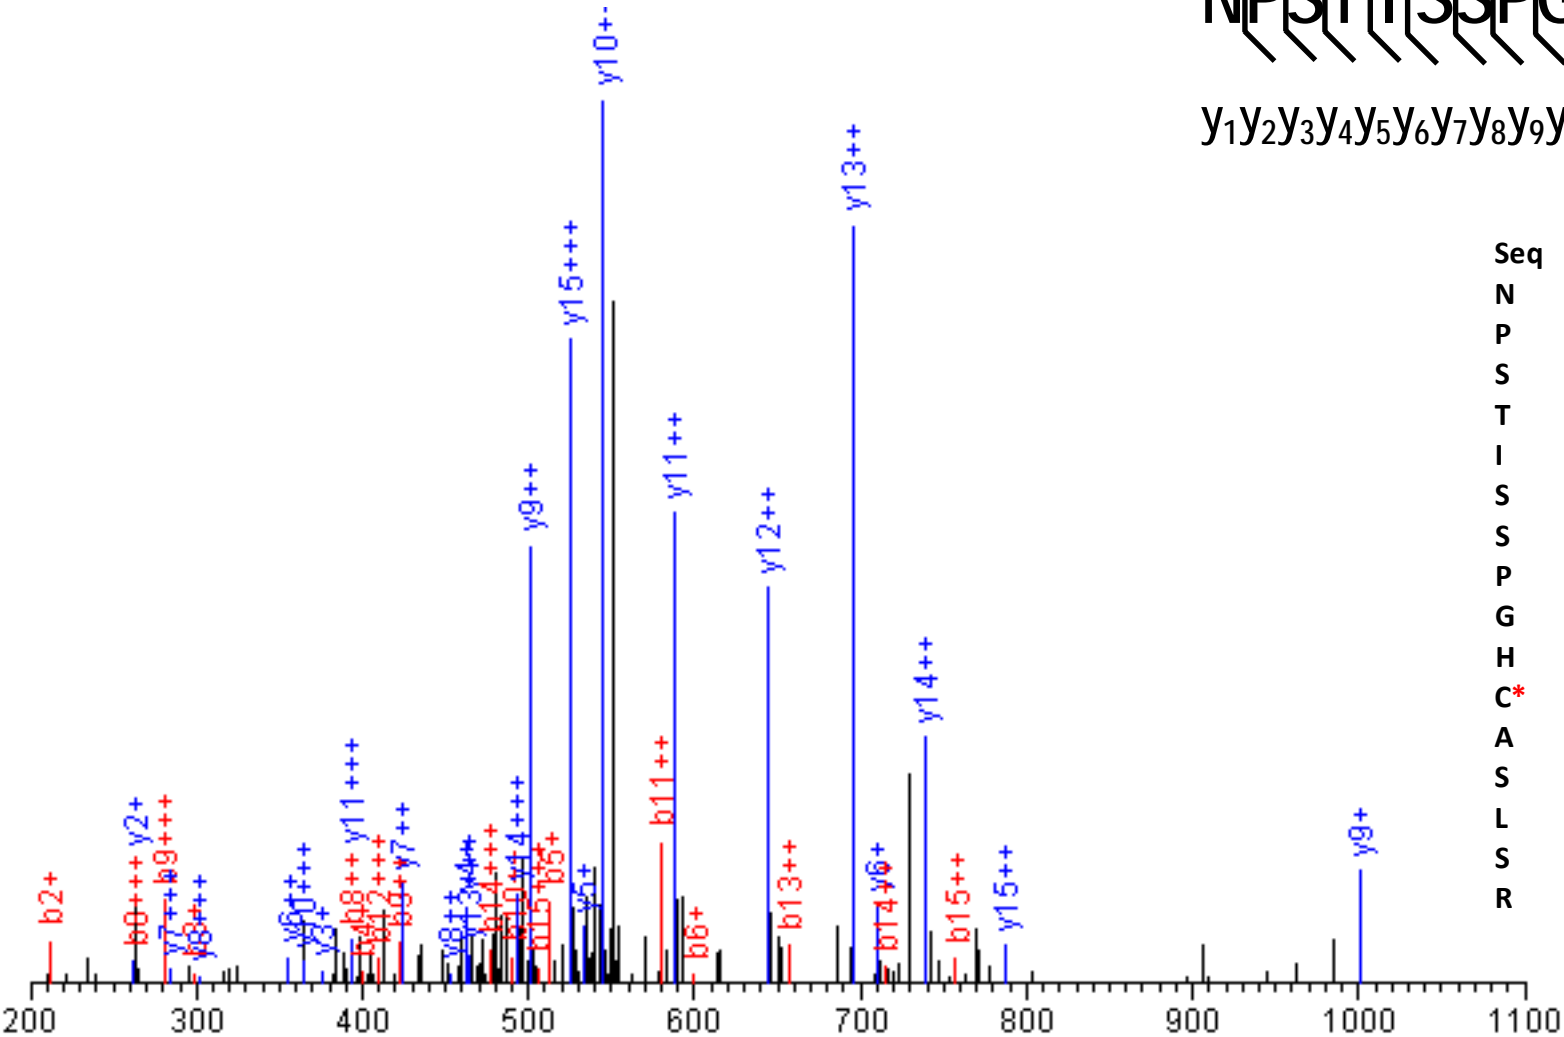

| Seq # | b         | y         | #  |
|-------|-----------|-----------|----|
| N 1   | 115.1118  |           | 16 |
| P 2   | 212.2285  | 1574.7163 | 15 |
| S 3   | 299.3067  | 1477.5996 | 14 |
| T 4   | 400.4117  | 1390.5214 | 13 |
| I 5   | 513.5712  | 1289.4164 | 12 |
| S 6   | 600.6494  | 1176.2569 | 11 |
| S 7   | 687.7276  | 1089.1787 | 10 |
| P 8   | 784.8443  | 1002.1005 | 9  |
| G 9   | 841.8962  | 904.9838  | 8  |
| H 10  | 979.0373  | 847.9319  | 7  |
| C* 11 | 1156.2228 | 710.7908  | 6  |
| A 12  | 1227.3016 | 533.6053  | 5  |
| S 13  | 1314.3798 | 462.5265  | 4  |
| L 14  | 1427.5392 | 375.4483  | 3  |
| S 15  | 1514.6174 | 262.2889  | 2  |
| R 16  | -         | 175.2107  | 1  |

REG3A, IPI00029039, Q06141

N-terminus MLPPMALPSV SWMLLSCLML LSQVOGEEPO RELPSARIRC PKGSKAYGSH CYALFLSPKS  
 WTDADLACQK RPSGNLVSVL SGAEGSFVSS LVKSIGNSYS YWIGLHDPT QGTEPNGEGW  
 EWSSSDVMNY FAWER**NPSTI SSPGHCASLS** RSTAFLRWKD YNCNVRLPYV CKFTD - C-terminus



# Figure S2

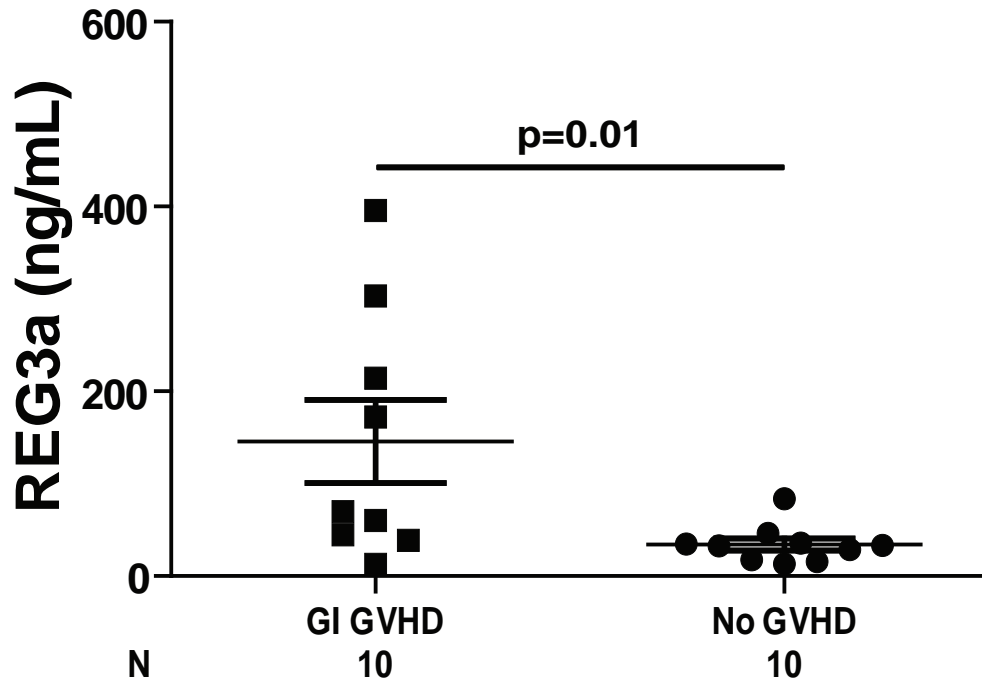

# Figure S3

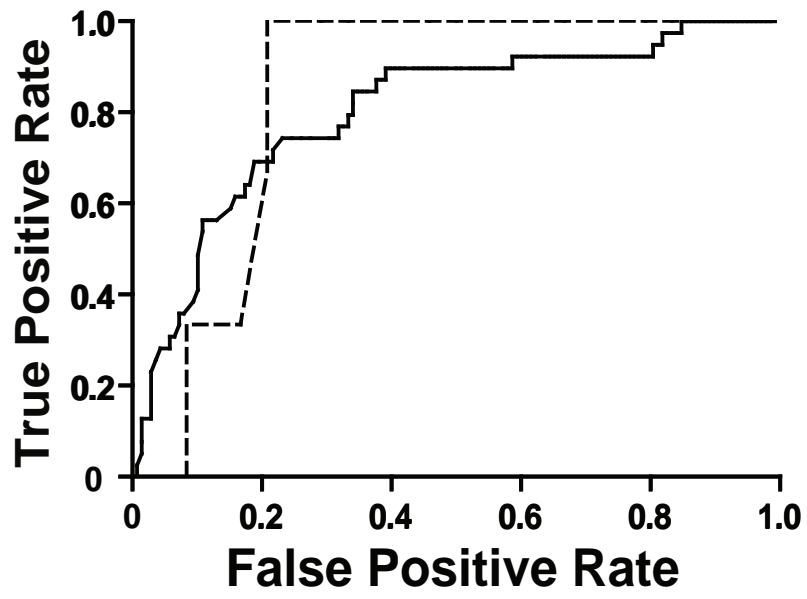

# Figure S4

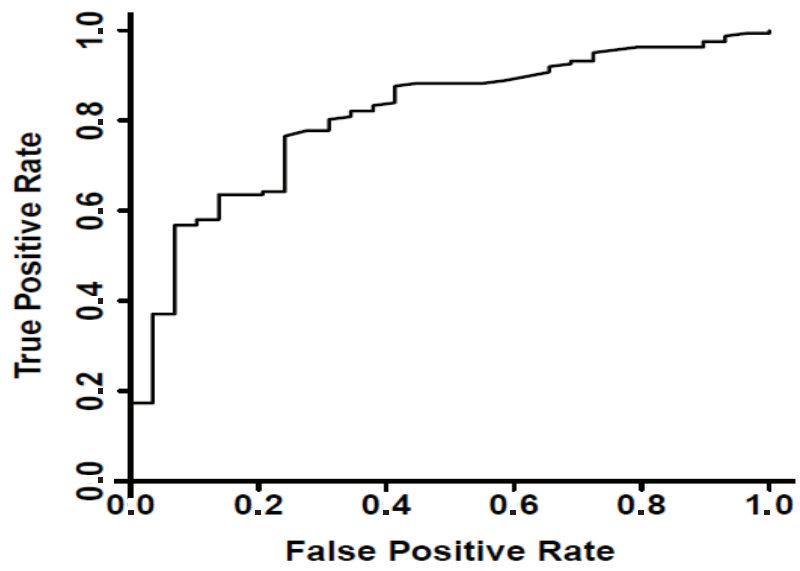

# Figure S5

## A

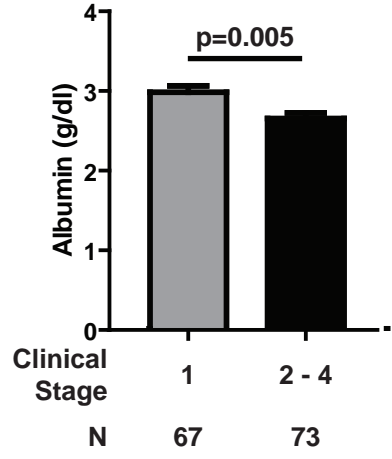

## B

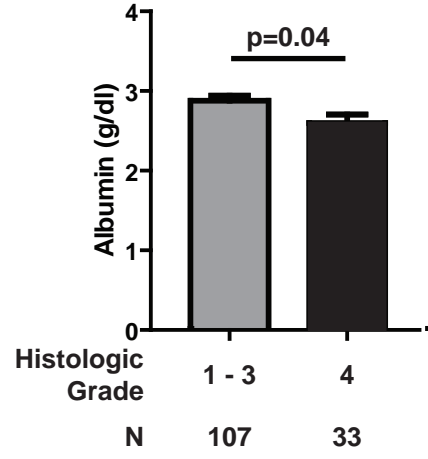

# Figure S6

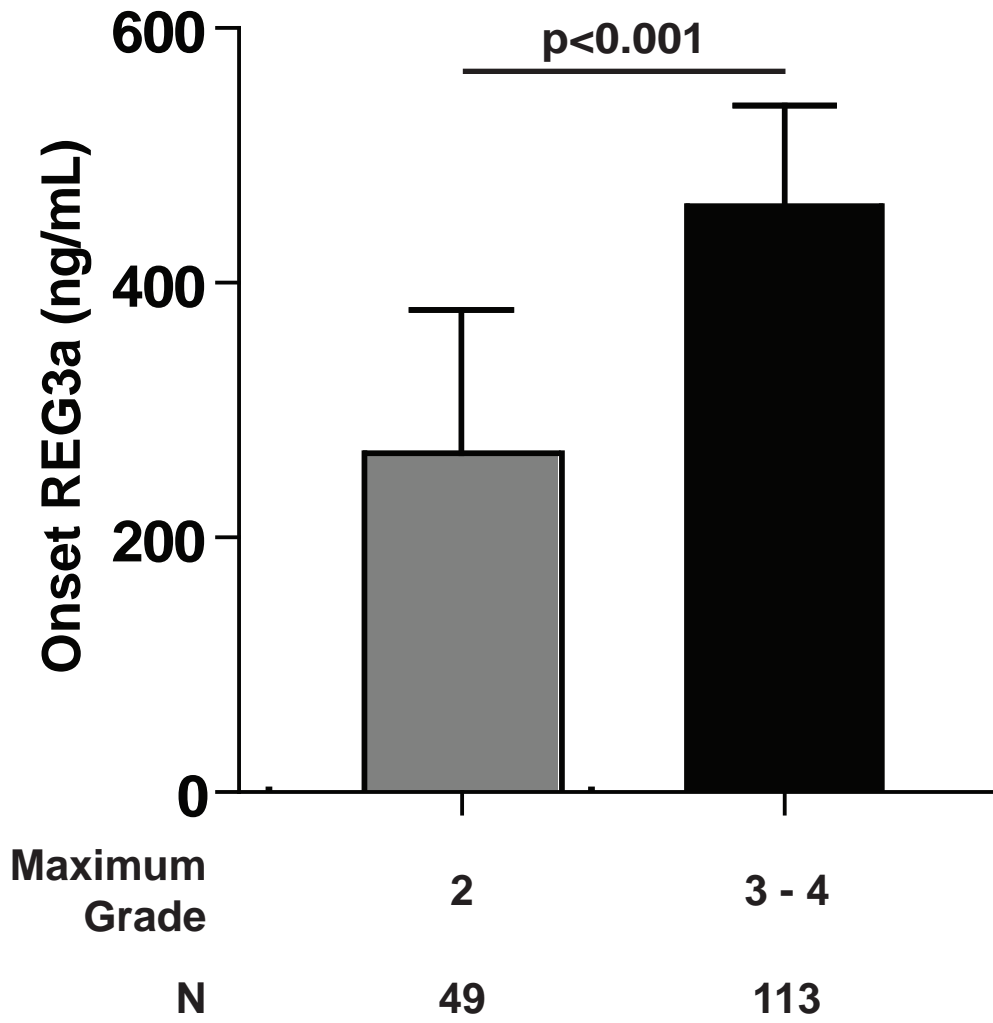

# Figure S7

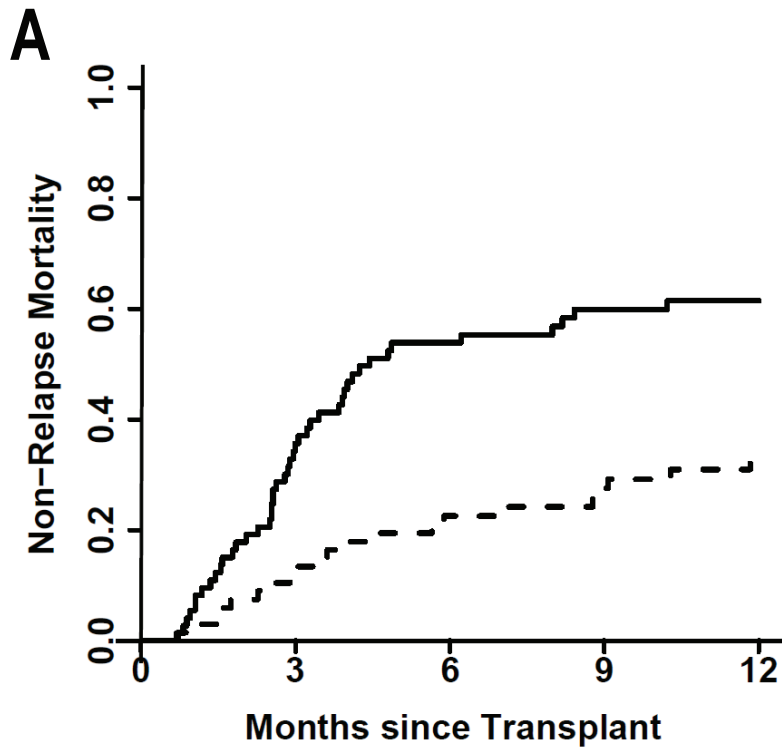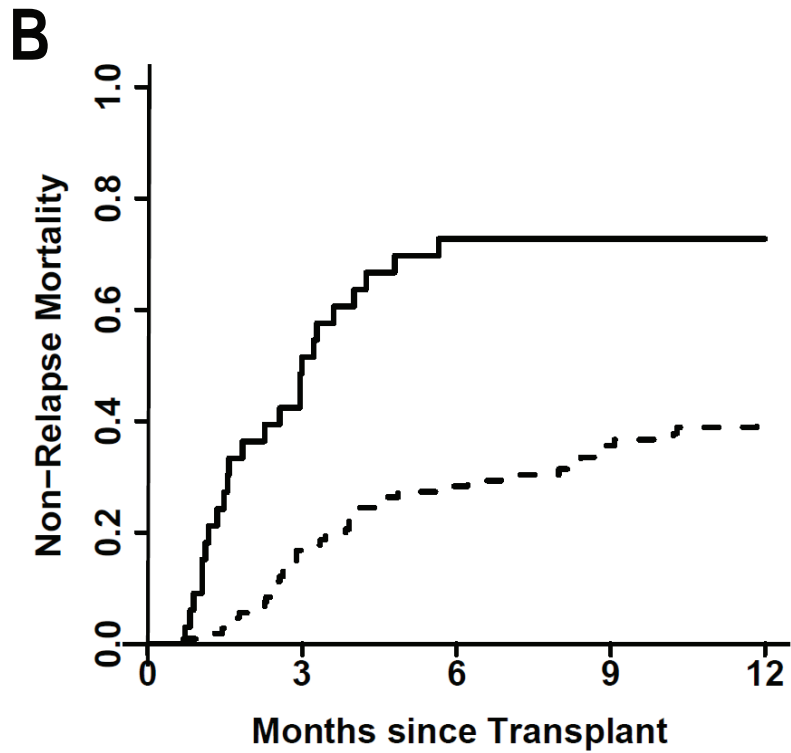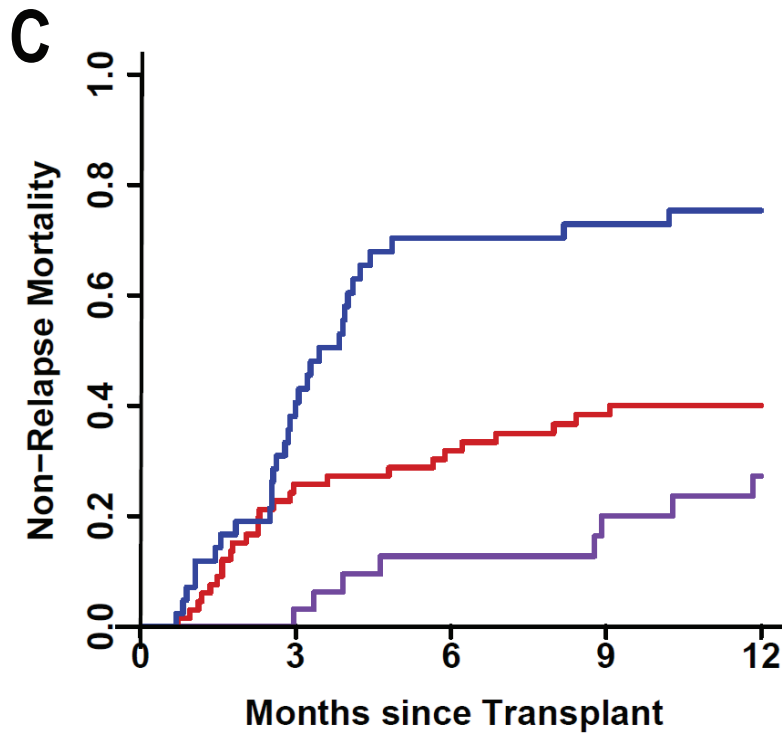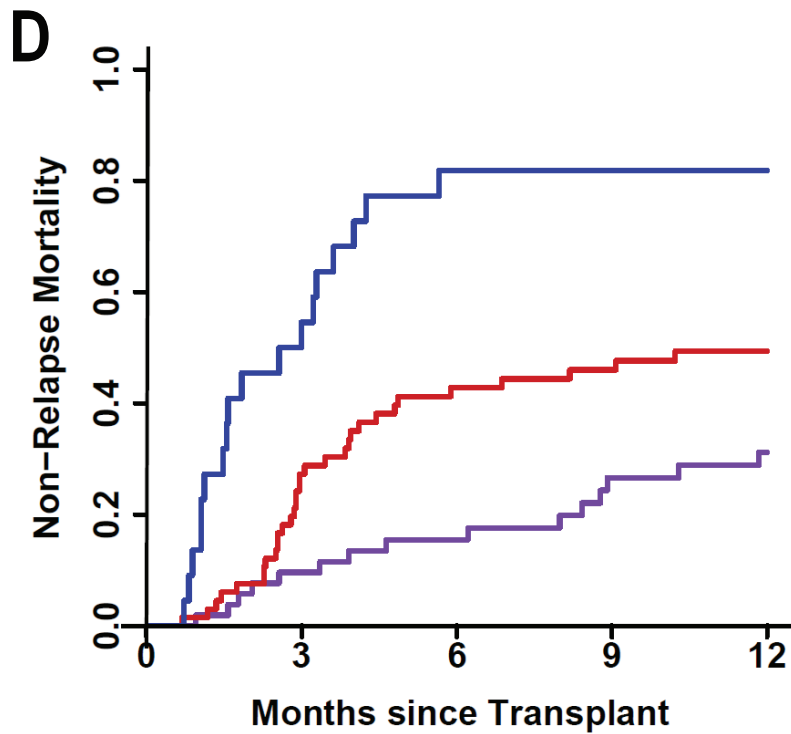

Supplement: supp_blood-2011-08-375006_Document1.pdf [file supp_blood-2011-08-375006_Document1.pdf]
